# Supplementary material for: The Role of Human Endogenous Retrovirus (HERV)-K119 env in THP-1 Monocytic Cell Differentiation
Source: MDPI journal article supplement (doi:10.3390/ijms242115566), 2023-10-25
Supplement: s1 [file s1]

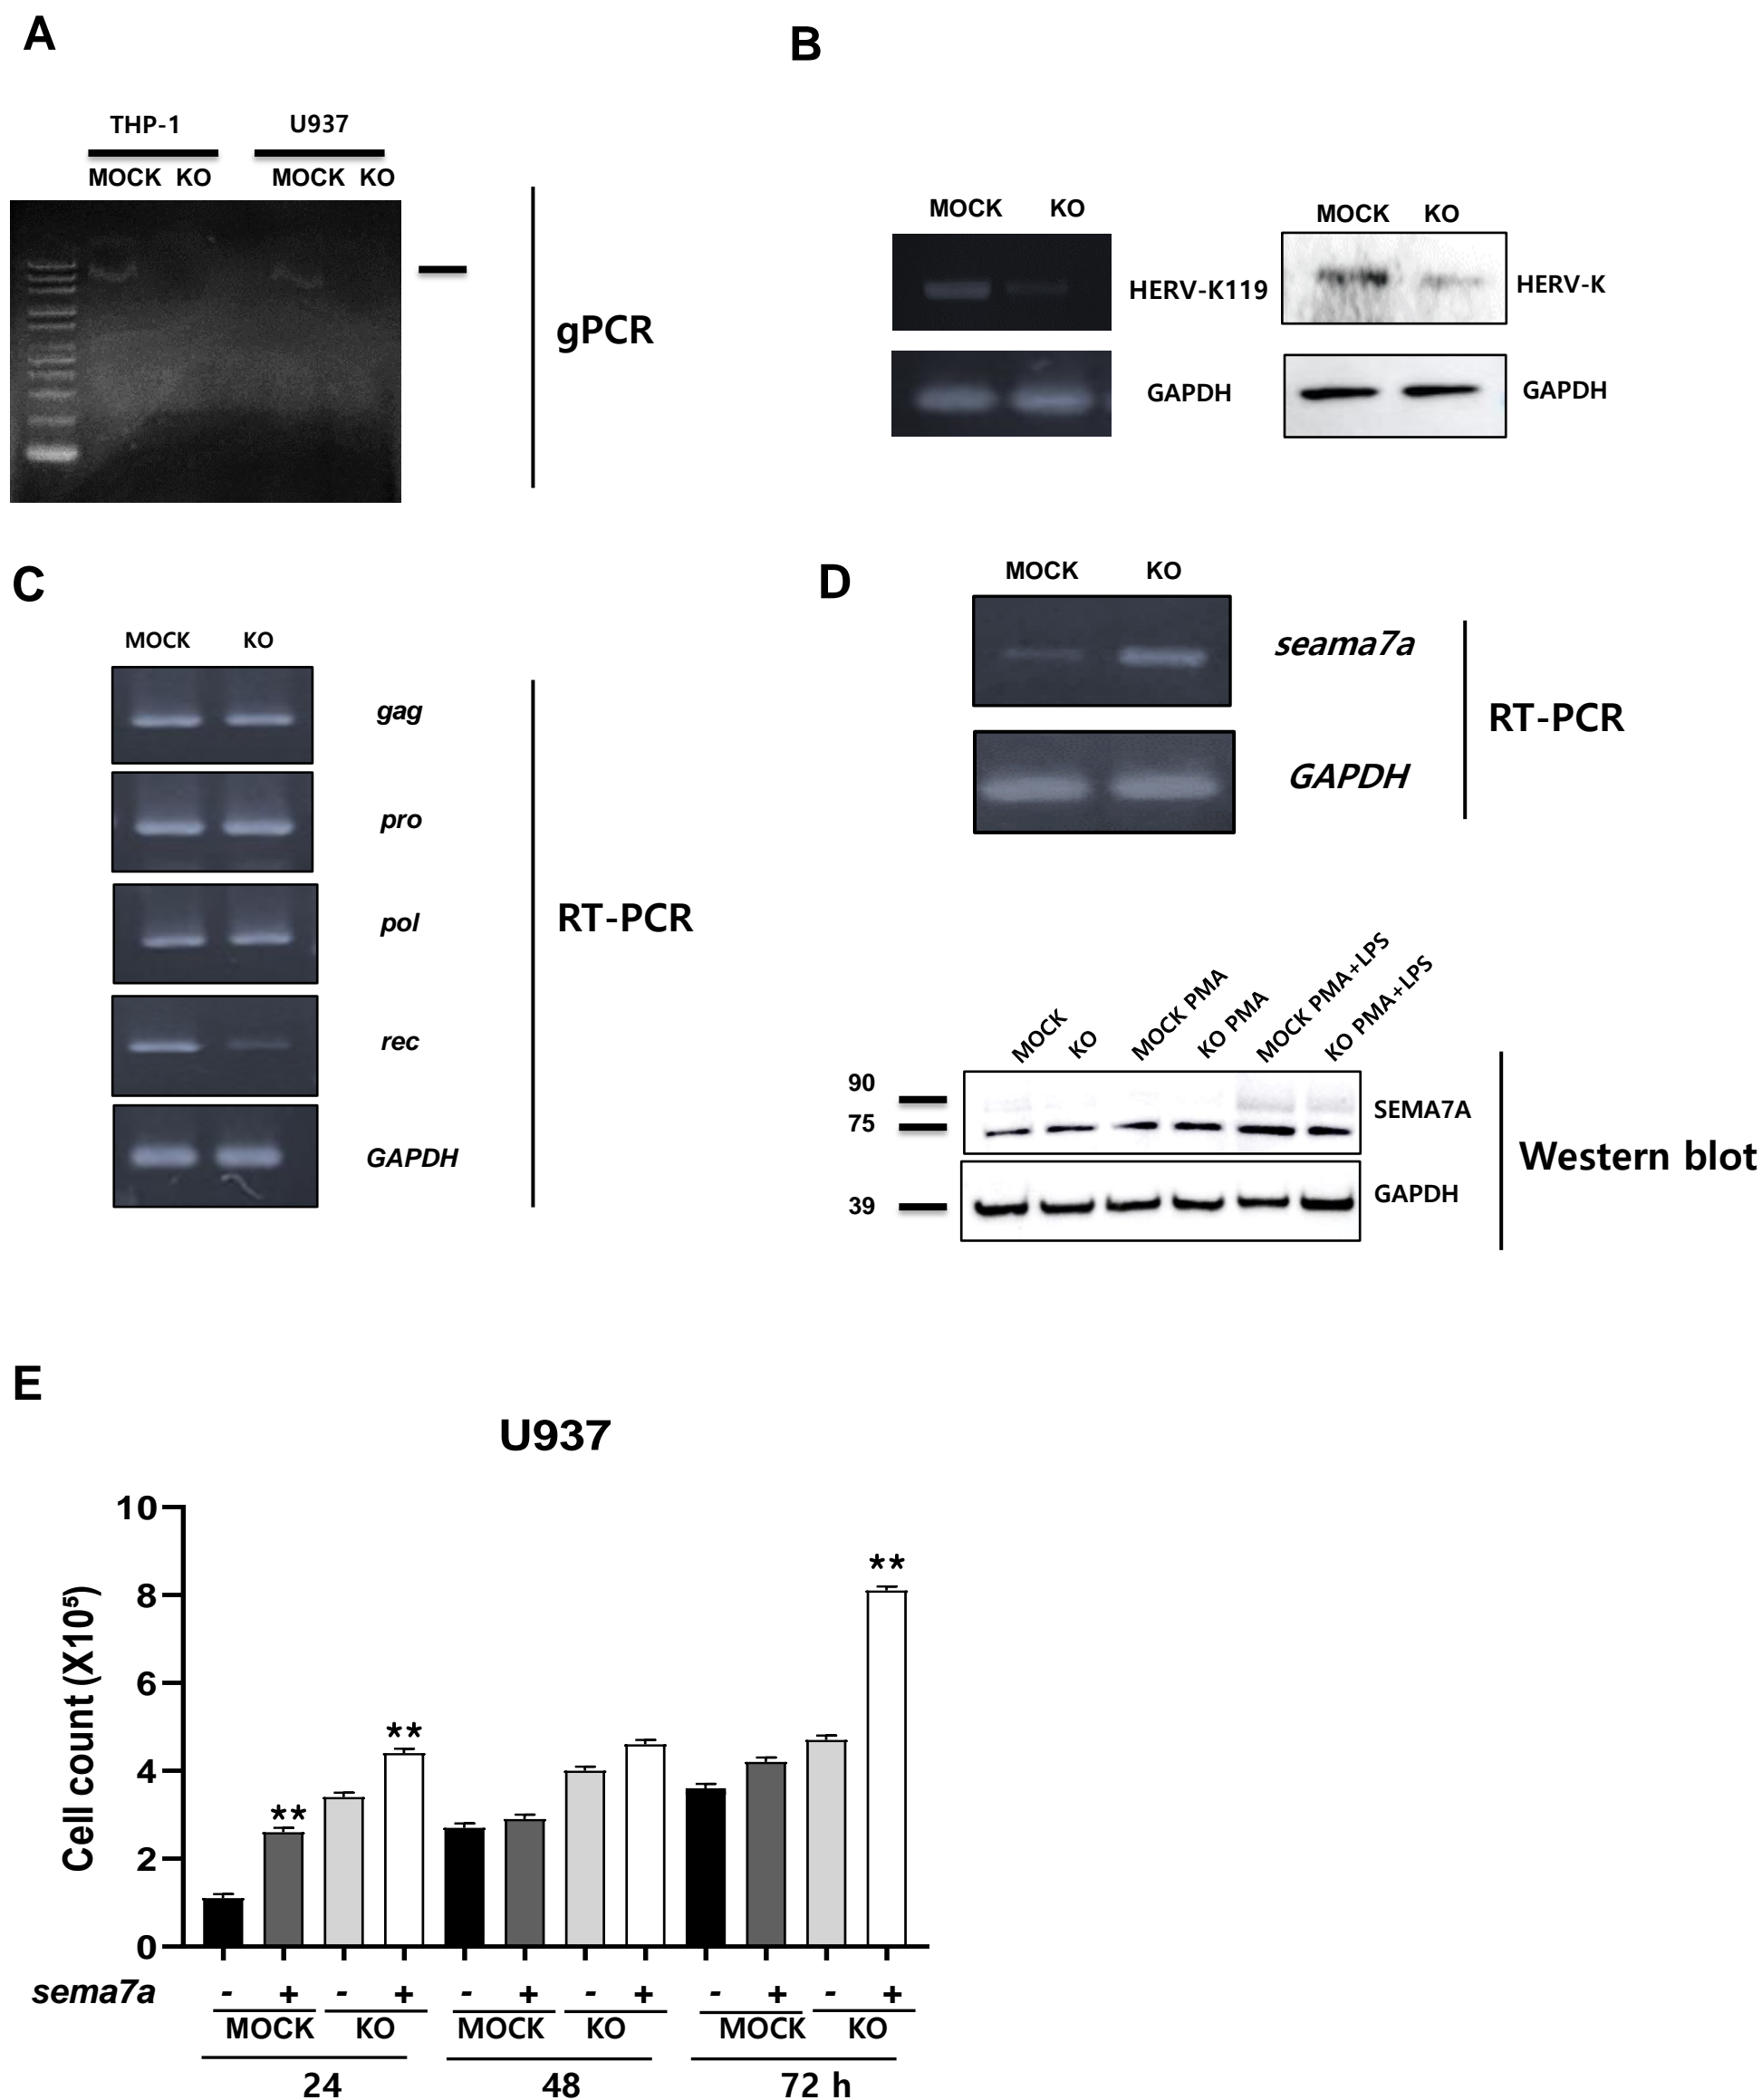

Supplementary Figure S1. HERV-K *env* KO in U937 monocytic cell.

(A) Knockout of HERV-K *env* gene in HERV-K119 region. Genomic polymerase chain reaction (gPCR) was performed for specific regions of HERV-K *env* gene to confirm its KO in U937 monocytic leukemia cells. (B) Expression of HERV-K *env* gene in HERV-K *env* KO U937 cells. The expression of HERV-K *env* at RNA and protein levels was analyzed using RT-PCR and Western blotting. (C) Expression of HERV-K119 *gag*, *pro*, *pol* and *rec* genes in U937 cells. (D) Expression of *sema7a* gene at RNA and protein levels. (E) Cell proliferation rate was significantly increased by over-expressing *sema7a* gene in U937 cells
